# Supplementary material
Source: PubMed Central journal article supplement (PMC10134479)
Supplement: NIHMS1735514-supplement-Supplemental_Digital_Content_1_.pdf [file NIHMS1735514-supplement-Supplemental_Digital_Content_1_.pdf]

## **List of Supplemental Digital Content**

Supplemental Digital Content 1. Tables showing baseline and follow-up characteristics of participants with and without suicidal ideation at each follow-up visit and bivariate associations of suicidal ideation with baseline and follow-up variables.

## Supplemental Digital Content 1

**Note for all tables:** Bivariate associations between categorical variables and suicidal ideation on the Patient Health Questionnaire were evaluated with Fisher's exact tests. Bivariate associations between continuous variables and suicidal ideation on the Patient Health Questionnaire were evaluated with Wilcoxon rank sum tests. W02= 2-week assessment; M03= 3-month assessment; M06= 6-month assessment; M12= 12-month assessment.

Table 1  
Suicidal ideation on Patient Health Questionnaire item 9 by sex

|            | No           | Yes        | Total      | <i>p</i> |
|------------|--------------|------------|------------|----------|
| <b>W02</b> |              |            |            |          |
| Male       | 576 (96.16%) | 23 (3.84%) | 599 (100%) | 0.8592   |
| Female     | 304 (95.9%)  | 13 (4.1%)  | 317 (100%) |          |
| Total      | 880 (96.07%) | 36 (3.93%) | 916 (100%) |          |
| <b>M03</b> |              |            |            |          |
| Male       | 537 (95.38%) | 26 (4.62%) | 563 (100%) | 0.2084   |
| Female     | 285 (93.14%) | 21 (6.86%) | 306 (100%) |          |
| Total      | 822 (94.59%) | 47 (5.41%) | 869 (100%) |          |
| <b>M06</b> |              |            |            |          |
| Male       | 502 (95.44%) | 24 (4.56%) | 526 (100%) | >0.9999  |
| Female     | 286 (95.33%) | 14 (4.67%) | 300 (100%) |          |
| Total      | 788 (95.4%)  | 38 (4.6%)  | 826 (100%) |          |
| <b>M12</b> |              |            |            |          |
| Male       | 466 (95.69%) | 21 (4.31%) | 487 (100%) | >0.9999  |
| Female     | 264 (96%)    | 11 (4%)    | 275 (100%) |          |
| Total      | 730 (95.8%)  | 32 (4.2%)  | 762 (100%) |          |

Table 2  
Suicidal ideation on Patient Health Questionnaire item 9 by race

|             | No           | Yes        | Total      | <i>p</i> |
|-------------|--------------|------------|------------|----------|
| <b>W02</b>  |              |            |            |          |
| White       | 665 (95.27%) | 33 (4.73%) | 698 (100%) | 0.4861   |
| Black/Other | 211 (94.2%)  | 13 (5.8%)  | 224 (100%) |          |
| Total       | 876 (95.01%) | 46 (4.99%) | 922 (100%) |          |
| <b>M03</b>  |              |            |            |          |
| White       | 623 (95.26%) | 31 (4.74%) | 654 (100%) | 0.118    |
| Black/Other | 195 (92.42%) | 16 (7.58%) | 211 (100%) |          |
| Total       | 818 (94.57%) | 47 (5.43%) | 865 (100%) |          |
| <b>M06</b>  |              |            |            |          |
| White       | 589 (95.62%) | 27 (4.38%) | 616 (100%) | 0.5667   |
| Black/Other | 194 (94.63%) | 11 (5.37%) | 205 (100%) |          |
| Total       | 783 (95.37%) | 38 (4.63%) | 821 (100%) |          |
| <b>M12</b>  |              |            |            |          |
| White       | 539 (95.91%) | 23 (4.09%) | 562 (100%) | 0.8369   |
| Black/Other | 188 (95.43%) | 9 (4.57%)  | 197 (100%) |          |
| Total       | 727 (95.78%) | 32 (4.22%) | 759 (100%) |          |

Table 3

Suicidal ideation on Patient Health Questionnaire item 9 by ethnicity

|              | No           | Yes        | Total      | <i>p</i> |
|--------------|--------------|------------|------------|----------|
| <b>W02</b>   |              |            |            |          |
| Non-Hispanic | 696 (95.34%) | 34 (4.66%) | 730 (100%) | 0.3588   |
| Hispanic     | 182 (93.81%) | 12 (6.19%) | 194 (100%) |          |
| Total        | 878 (95.02%) | 46 (4.98%) | 924 (100%) |          |
| <b>M03</b>   |              |            |            |          |
| Non-Hispanic | 668 (95.16%) | 34 (4.84%) | 702 (100%) | 0.1259   |
| Hispanic     | 151 (92.07%) | 13 (7.93%) | 164 (100%) |          |
| Total        | 819 (94.57%) | 47 (5.43%) | 866 (100%) |          |
| <b>M06</b>   |              |            |            |          |
| Non-Hispanic | 642 (95.25%) | 32 (4.75%) | 674 (100%) | 0.8313   |
| Hispanic     | 143 (95.97%) | 6 (4.03%)  | 149 (100%) |          |
| Total        | 785 (95.38%) | 38 (4.62%) | 823 (100%) |          |
| <b>M12</b>   |              |            |            |          |
| Non-Hispanic | 610 (95.61%) | 28 (4.39%) | 638 (100%) | 0.8052   |
| Hispanic     | 117 (96.69%) | 4 (3.31%)  | 121 (100%) |          |
| Total        | 727 (95.78%) | 32 (4.22%) | 759 (100%) |          |

Table 4

Years of education at baseline by suicidal ideation on Patient Health Questionnaire item 9

|            | N   | Mean   | SD    | Min | Q1 | Median | Q3    | Max | <i>p</i> |
|------------|-----|--------|-------|-----|----|--------|-------|-----|----------|
| <b>W02</b> |     |        |       |     |    |        |       |     |          |
| No         | 867 | 13.653 | 2.919 | 0   | 12 | 13     | 16    | 20  | 0.1174   |
| Yes        | 44  | 12.909 | 2.288 | 7   | 12 | 12     | 14.25 | 18  |          |
| Overall    | 911 | 13.617 | 2.895 | 0   | 12 | 13     | 16    | 20  |          |
| <b>M03</b> |     |        |       |     |    |        |       |     |          |
| No         | 811 | 13.721 | 2.929 | 0   | 12 | 13     | 16    | 20  | 0.1306   |
| Yes        | 47  | 13.096 | 2.337 | 7   | 12 | 12     | 15.75 | 18  |          |
| Overall    | 858 | 13.686 | 2.902 | 0   | 12 | 13     | 16    | 20  |          |
| <b>M06</b> |     |        |       |     |    |        |       |     |          |
| No         | 775 | 13.741 | 2.902 | 0   | 12 | 13     | 16    | 20  | 0.8404   |
| Yes        | 38  | 14.039 | 2.839 | 10  | 12 | 13     | 16    | 20  |          |
| Overall    | 813 | 13.755 | 2.898 | 0   | 12 | 13     | 16    | 20  |          |
| <b>M12</b> |     |        |       |     |    |        |       |     |          |
| No         | 721 | 13.868 | 2.862 | 0   | 12 | 13     | 16    | 20  | 0.2259   |
| Yes        | 32  | 13.312 | 2.334 | 9   | 12 | 12     | 15.25 | 20  |          |
| Overall    | 753 | 13.844 | 2.843 | 0   | 12 | 13     | 16    | 20  |          |

Table 5

Age at baseline by suicidal ideation on Patient Health Questionnaire item 9

|            | N   | Mean   | SD     | Min | Q1    | Median | Q3    | Max | <i>p</i> |
|------------|-----|--------|--------|-----|-------|--------|-------|-----|----------|
| <b>W02</b> |     |        |        |     |       |        |       |     |          |
| No         | 881 | 39.608 | 16.723 | 17  | 25    | 36     | 52    | 90  | 0.0504   |
| Yes        | 46  | 33.957 | 12.35  | 18  | 24.25 | 29.5   | 43.25 | 59  |          |
| Overall    | 927 | 39.328 | 16.573 | 17  | 25    | 36     | 52    | 90  |          |
| <b>M03</b> |     |        |        |     |       |        |       |     |          |
| No         | 822 | 40.854 | 17.189 | 17  | 26    | 38     | 53    | 90  | 0.0342   |
| Yes        | 47  | 34.596 | 12.418 | 19  | 25    | 31     | 42    | 60  |          |
| Overall    | 869 | 40.516 | 17.019 | 17  | 26    | 37     | 53    | 90  |          |
| <b>M06</b> |     |        |        |     |       |        |       |     |          |
| No         | 788 | 40.482 | 17.114 | 17  | 25    | 37.5   | 53    | 90  | 0.8569   |
| Yes        | 38  | 38.842 | 14.009 | 20  | 27    | 36     | 51    | 76  |          |
| Overall    | 826 | 40.407 | 16.98  | 17  | 25.25 | 37     | 53    | 90  |          |
| <b>M12</b> |     |        |        |     |       |        |       |     |          |
| No         | 730 | 41.023 | 17.304 | 17  | 26    | 38     | 54    | 90  | 0.3159   |
| Yes        | 32  | 36.844 | 12.182 | 20  | 25.75 | 36.5   | 47.25 | 59  |          |
| Overall    | 762 | 40.848 | 17.134 | 17  | 26    | 38     | 53    | 90  |          |

Table 6

Suicidal ideation on Patient Health Questionnaire item 9 by age group at baseline

|            | No           | Yes        | Total      | <i>p</i> |
|------------|--------------|------------|------------|----------|
| <b>W02</b> |              |            |            |          |
| 17-24      | 208 (94.55%) | 12 (5.45%) | 220 (100%) | 0.0631   |
| 25-44      | 341 (93.68%) | 23 (6.32%) | 364 (100%) |          |
| 45-64      | 250 (95.79%) | 11 (4.21%) | 261 (100%) |          |
| 65+        | 82 (100%)    | 0 (0%)     | 82 (100%)  |          |
| Total      | 881 (95.04%) | 46 (4.96%) | 927 (100%) |          |
| <b>M03</b> |              |            |            |          |
| 17-24      | 176 (94.12%) | 11 (5.88%) | 187 (100%) | 0.018    |
| 25-44      | 313 (92.6%)  | 25 (7.4%)  | 338 (100%) |          |
| 45-64      | 244 (95.69%) | 11 (4.31%) | 255 (100%) |          |
| 65+        | 89 (100%)    | 0 (0%)     | 89 (100%)  |          |
| Total      | 822 (94.59%) | 47 (5.41%) | 869 (100%) |          |
| <b>M06</b> |              |            |            |          |
| 17-24      | 177 (96.2%)  | 7 (3.8%)   | 184 (100%) | 0.3344   |
| 25-44      | 294 (94.23%) | 18 (5.77%) | 312 (100%) |          |
| 45-64      | 234 (95.12%) | 12 (4.88%) | 246 (100%) |          |
| 65+        | 83 (98.81%)  | 1 (1.19%)  | 84 (100%)  |          |
| Total      | 788 (95.4%)  | 38 (4.6%)  | 826 (100%) |          |
| <b>M12</b> |              |            |            |          |
| 17-24      | 157 (95.73%) | 7 (4.27%)  | 164 (100%) | 0.1547   |
| 25-44      | 272 (94.77%) | 15 (5.23%) | 287 (100%) |          |
| 45-64      | 218 (95.61%) | 10 (4.39%) | 228 (100%) |          |
| 65+        | 83 (100%)    | 0 (0%)     | 83 (100%)  |          |
| Total      | 730 (95.8%)  | 32 (4.2%)  | 762 (100%) |          |

Table 7

Suicidal ideation on Patient Health Questionnaire item 9 by injury cause

|                    | No           | Yes        | Total      | <i>p</i> |
|--------------------|--------------|------------|------------|----------|
| <b>W02</b>         |              |            |            |          |
| Traffic/Fall/Other | 824 (94.71%) | 46 (5.29%) | 870 (100%) | 0.1067   |
| Violence/Assault   | 57 (100%)    | 0 (0%)     | 57 (100%)  |          |
| Total              | 881 (95.04%) | 46 (4.96%) | 927 (100%) |          |
| <b>M03</b>         |              |            |            |          |
| Traffic/Fall/Other | 774 (94.62%) | 44 (5.38%) | 818 (100%) | 0.7516   |
| Violence/Assault   | 48 (94.12%)  | 3 (5.88%)  | 51 (100%)  |          |
| Total              | 822 (94.59%) | 47 (5.41%) | 869 (100%) |          |
| <b>M06</b>         |              |            |            |          |
| Traffic/Fall/Other | 742 (95.25%) | 37 (4.75%) | 779 (100%) | 0.7178   |
| Violence/Assault   | 46 (97.87%)  | 1 (2.13%)  | 47 (100%)  |          |
| Total              | 788 (95.4%)  | 38 (4.6%)  | 826 (100%) |          |
| <b>M12</b>         |              |            |            |          |
| Traffic/Fall/Other | 693 (95.98%) | 29 (4.02%) | 722 (100%) | 0.2329   |
| Violence/Assault   | 37 (92.5%)   | 3 (7.5%)   | 40 (100%)  |          |
| Total              | 730 (95.8%)  | 32 (4.2%)  | 762 (100%) |          |

Table 8

Suicidal ideation on Patient Health Questionnaire item 9 by patient triage disposition

|                         | No           | Yes        | Total      | <i>p</i> |
|-------------------------|--------------|------------|------------|----------|
| <b>W02</b>              |              |            |            |          |
| ED Discharge            | 321 (95.82%) | 14 (4.18%) | 335 (100%) | 0.1327   |
| Hospital admit no ICU   | 368 (93.4%)  | 26 (6.6%)  | 394 (100%) |          |
| Hospital admit with ICU | 192 (96.97%) | 6 (3.03%)  | 198 (100%) |          |
| Total                   | 881 (95.04%) | 46 (4.96%) | 927 (100%) |          |
| <b>M03</b>              |              |            |            |          |
| ED Discharge            | 281 (93.05%) | 21 (6.95%) | 302 (100%) | 0.1798   |
| Hospital admit no ICU   | 355 (94.67%) | 20 (5.33%) | 375 (100%) |          |
| Hospital admit with ICU | 186 (96.88%) | 6 (3.12%)  | 192 (100%) |          |
| Total                   | 822 (94.59%) | 47 (5.41%) | 869 (100%) |          |
| <b>M06</b>              |              |            |            |          |
| ED Discharge            | 279 (94.58%) | 16 (5.42%) | 295 (100%) | 0.3354   |
| Hospital admit no ICU   | 326 (95.04%) | 17 (4.96%) | 343 (100%) |          |
| Hospital admit with ICU | 183 (97.34%) | 5 (2.66%)  | 188 (100%) |          |
| Total                   | 788 (95.4%)  | 38 (4.6%)  | 826 (100%) |          |
| <b>M12</b>              |              |            |            |          |
| ED Discharge            | 251 (95.44%) | 12 (4.56%) | 263 (100%) | 0.9466   |
| Hospital admit no ICU   | 303 (95.89%) | 13 (4.11%) | 316 (100%) |          |
| Hospital admit with ICU | 176 (96.17%) | 7 (3.83%)  | 183 (100%) |          |
| Total                   | 730 (95.8%)  | 32 (4.2%)  | 762 (100%) |          |

Table 9

Suicidal ideation on Patient Health Questionnaire item 9 by loss of consciousness

|            | No           | Yes        | Total      | <i>p</i> |
|------------|--------------|------------|------------|----------|
| <b>W02</b> |              |            |            |          |
| No         | 125 (97.66%) | 3 (2.34%)  | 128 (100%) | 0.1853   |
| Yes        | 714 (94.69%) | 40 (5.31%) | 754 (100%) |          |
| Total      | 839 (95.12%) | 43 (4.88%) | 882 (100%) |          |
| <b>M03</b> |              |            |            |          |
| No         | 122 (96.06%) | 5 (3.94%)  | 127 (100%) | 0.6661   |
| Yes        | 661 (94.43%) | 39 (5.57%) | 700 (100%) |          |
| Total      | 783 (94.68%) | 44 (5.32%) | 827 (100%) |          |
| <b>M06</b> |              |            |            |          |
| No         | 113 (96.58%) | 4 (3.42%)  | 117 (100%) | 0.8055   |
| Yes        | 634 (95.63%) | 29 (4.37%) | 663 (100%) |          |
| Total      | 747 (95.77%) | 33 (4.23%) | 780 (100%) |          |
| <b>M12</b> |              |            |            |          |
| No         | 108 (97.3%)  | 3 (2.7%)   | 111 (100%) | 0.6025   |
| Yes        | 583 (95.89%) | 25 (4.11%) | 608 (100%) |          |
| Total      | 691 (96.11%) | 28 (3.89%) | 719 (100%) |          |

Table 10

Suicidal ideation on Patient Health Questionnaire item 9 by posttraumatic amnesia

|            | No           | Yes        | Total      | <i>p</i> |
|------------|--------------|------------|------------|----------|
| <b>W02</b> |              |            |            |          |
| No         | 175 (95.11%) | 9 (4.89%)  | 184 (100%) | >0.9999  |
| Yes        | 622 (95.11%) | 32 (4.89%) | 654 (100%) |          |
| Total      | 797 (95.11%) | 41 (4.89%) | 838 (100%) |          |
| <b>M03</b> |              |            |            |          |
| No         | 164 (93.71%) | 11 (6.29%) | 175 (100%) | 0.568    |
| Yes        | 577 (94.9%)  | 31 (5.1%)  | 608 (100%) |          |
| Total      | 741 (94.64%) | 42 (5.36%) | 783 (100%) |          |
| <b>M06</b> |              |            |            |          |
| No         | 155 (93.94%) | 10 (6.06%) | 165 (100%) | 0.4154   |
| Yes        | 547 (95.46%) | 26 (4.54%) | 573 (100%) |          |
| Total      | 702 (95.12%) | 36 (4.88%) | 738 (100%) |          |
| <b>M12</b> |              |            |            |          |
| No         | 141 (95.92%) | 6 (4.08%)  | 147 (100%) | >0.9999  |
| Yes        | 509 (95.32%) | 25 (4.68%) | 534 (100%) |          |
| Total      | 650 (95.45%) | 31 (4.55%) | 681 (100%) |          |

Table 11

Suicidal ideation on Patient Health Questionnaire item 9 by imaging results

|            | No           | Yes        | Total      | <i>p</i> |
|------------|--------------|------------|------------|----------|
| <b>W02</b> |              |            |            |          |
| CT-        | 611 (93.86%) | 40 (6.14%) | 651 (100%) | 0.0063   |
| CT+        | 261 (98.12%) | 5 (1.88%)  | 266 (100%) |          |
| Total      | 872 (95.09%) | 45 (4.91%) | 917 (100%) |          |
| <b>M03</b> |              |            |            |          |
| CT-        | 565 (93.54%) | 39 (6.46%) | 604 (100%) | 0.0503   |
| CT+        | 247 (96.86%) | 8 (3.14%)  | 255 (100%) |          |
| Total      | 812 (94.53%) | 47 (5.47%) | 859 (100%) |          |
| <b>M06</b> |              |            |            |          |
| CT-        | 535 (94.52%) | 31 (5.48%) | 566 (100%) | 0.0665   |
| CT+        | 245 (97.61%) | 6 (2.39%)  | 251 (100%) |          |
| Total      | 780 (95.47%) | 37 (4.53%) | 817 (100%) |          |
| <b>M12</b> |              |            |            |          |
| CT-        | 490 (95.33%) | 24 (4.67%) | 514 (100%) | 0.4447   |
| CT+        | 232 (96.67%) | 8 (3.33%)  | 240 (100%) |          |
| Total      | 722 (95.76%) | 32 (4.24%) | 754 (100%) |          |

Table 12

Suicidal ideation on Patient Health Questionnaire item 9 by psychiatric history

|            | No           | Yes         | Total      | <i>p</i> |
|------------|--------------|-------------|------------|----------|
| <b>W02</b> |              |             |            |          |
| No         | 704 (96.17%) | 28 (3.83%)  | 732 (100%) | 0.0077   |
| Yes        | 177 (91.24%) | 17 (8.76%)  | 194 (100%) |          |
| Total      | 881 (95.14%) | 45 (4.86%)  | 926 (100%) |          |
| <b>M03</b> |              |             |            |          |
| No         | 656 (96.05%) | 27 (3.95%)  | 683 (100%) | 8e-04    |
| Yes        | 166 (89.25%) | 20 (10.75%) | 186 (100%) |          |
| Total      | 822 (94.59%) | 47 (5.41%)  | 869 (100%) |          |
| <b>M06</b> |              |             |            |          |
| No         | 628 (97.36%) | 17 (2.64%)  | 645 (100%) | <0.0001  |
| Yes        | 160 (88.4%)  | 21 (11.6%)  | 181 (100%) |          |
| Total      | 788 (95.4%)  | 38 (4.6%)   | 826 (100%) |          |
| <b>M12</b> |              |             |            |          |
| No         | 580 (97.81%) | 13 (2.19%)  | 593 (100%) | <0.0001  |
| Yes        | 150 (88.76%) | 19 (11.24%) | 169 (100%) |          |
| Total      | 730 (95.8%)  | 32 (4.2%)   | 762 (100%) |          |

Table 13

Suicidal ideation on Patient Health Questionnaire item 9 by prior TBI

|            | No           | Yes        | Total      | <i>p</i> |
|------------|--------------|------------|------------|----------|
| <b>W02</b> |              |            |            |          |
| No         | 596 (96.6%)  | 21 (3.4%)  | 617 (100%) | 0.0076   |
| Yes        | 277 (92.33%) | 23 (7.67%) | 300 (100%) |          |
| Total      | 873 (95.2%)  | 44 (4.8%)  | 917 (100%) |          |
| <b>M03</b> |              |            |            |          |
| No         | 564 (96.41%) | 21 (3.59%) | 585 (100%) | 0.0011   |
| Yes        | 251 (90.61%) | 26 (9.39%) | 277 (100%) |          |
| Total      | 815 (94.55%) | 47 (5.45%) | 862 (100%) |          |
| <b>M06</b> |              |            |            |          |
| No         | 541 (97.3%)  | 15 (2.7%)  | 556 (100%) | <.0001   |
| Yes        | 240 (91.25%) | 23 (8.75%) | 263 (100%) |          |
| Total      | 781 (95.36%) | 38 (4.64%) | 819 (100%) |          |
| <b>M12</b> |              |            |            |          |
| No         | 501 (97.28%) | 14 (2.72%) | 515 (100%) | 0.0035   |
| Yes        | 222 (92.5%)  | 18 (7.5%)  | 240 (100%) |          |
| Total      | 723 (95.76%) | 32 (4.24%) | 755 (100%) |          |

Table 14

Suicidal ideation on Patient Health Questionnaire item 9 by hazardous alcohol use

|            | No           | Yes        | Total      | <i>p</i> |
|------------|--------------|------------|------------|----------|
| <b>W02</b> |              |            |            |          |
| AUDIT-     | 512 (94.81%) | 28 (5.19%) | 540 (100%) | 0.5252   |
| AUDIT+     | 356 (95.96%) | 15 (4.04%) | 371 (100%) |          |
| Total      | 868 (95.28%) | 43 (4.72%) | 911 (100%) |          |
| <b>M03</b> |              |            |            |          |
| AUDIT-     | 486 (94.55%) | 28 (5.45%) | 514 (100%) | >0.9999  |
| AUDIT+     | 326 (94.49%) | 19 (5.51%) | 345 (100%) |          |
| Total      | 812 (94.53%) | 47 (5.47%) | 859 (100%) |          |
| <b>M06</b> |              |            |            |          |
| AUDIT-     | 470 (95.33%) | 23 (4.67%) | 493 (100%) | >0.9999  |
| AUDIT+     | 306 (95.33%) | 15 (4.67%) | 321 (100%) |          |
| Total      | 776 (95.33%) | 38 (4.67%) | 814 (100%) |          |
| <b>M12</b> |              |            |            |          |
| AUDIT-     | 430 (95.98%) | 18 (4.02%) | 448 (100%) | 0.7147   |
| AUDIT+     | 288 (95.36%) | 14 (4.64%) | 302 (100%) |          |
| Total      | 718 (95.73%) | 32 (4.27%) | 750 (100%) |          |



Table 15

Suicidal ideation on Patient Health Questionnaire item 9 by past-year drug use

|            | No           | Yes        | Total      | <i>p</i> |
|------------|--------------|------------|------------|----------|
| <b>W02</b> |              |            |            |          |
| No         | 649 (96.15%) | 26 (3.85%) | 675 (100%) | 0.048    |
| Yes        | 218 (92.77%) | 17 (7.23%) | 235 (100%) |          |
| Total      | 867 (95.27%) | 43 (4.73%) | 910 (100%) |          |
| <b>M03</b> |              |            |            |          |
| No         | 613 (95.48%) | 29 (4.52%) | 642 (100%) | 0.0367   |
| Yes        | 195 (91.55%) | 18 (8.45%) | 213 (100%) |          |
| Total      | 808 (94.5%)  | 47 (5.5%)  | 855 (100%) |          |
| <b>M06</b> |              |            |            |          |
| No         | 591 (96.25%) | 23 (3.75%) | 614 (100%) | 0.035    |
| Yes        | 186 (92.54%) | 15 (7.46%) | 201 (100%) |          |
| Total      | 777 (95.34%) | 38 (4.66%) | 815 (100%) |          |
| <b>M12</b> |              |            |            |          |
| No         | 551 (96.67%) | 19 (3.33%) | 570 (100%) | 0.0331   |
| Yes        | 167 (92.78%) | 13 (7.22%) | 180 (100%) |          |
| Total      | 718 (95.73%) | 32 (4.27%) | 750 (100%) |          |

Table 16

Rivermead Post-Concussion Symptoms Questionnaire score by suicidal ideation on Patient Health Questionnaire item 9

|            | N   | Mean   | SD     | Min | Q1   | Median | Q3   | Max | <i>p</i> |
|------------|-----|--------|--------|-----|------|--------|------|-----|----------|
| <b>W02</b> |     |        |        |     |      |        |      |     |          |
| No         | 879 | 17.729 | 14.812 | 0   | 5    | 14     | 27   | 61  | <0.0001  |
| Yes        | 46  | 29.609 | 14.378 | 0   | 17.5 | 31     | 37   | 59  |          |
| Overall    | 925 | 18.32  | 15.008 | 0   | 6    | 15     | 28   | 61  |          |
| <b>M03</b> |     |        |        |     |      |        |      |     |          |
| No         | 822 | 13.342 | 14.376 | 0   | 2    | 8      | 22   | 63  | <0.0001  |
| Yes        | 47  | 28.936 | 15.823 | 0   | 16   | 31     | 40   | 60  |          |
| Overall    | 869 | 14.185 | 14.873 | 0   | 2    | 9      | 24   | 63  |          |
| <b>M06</b> |     |        |        |     |      |        |      |     |          |
| No         | 788 | 11.981 | 13.646 | 0   | 0    | 6      | 19   | 57  | <0.0001  |
| Yes        | 38  | 30.184 | 20.722 | 0   | 9.5  | 32.5   | 48   | 60  |          |
| Overall    | 826 | 12.818 | 14.542 | 0   | 0    | 7      | 20   | 60  |          |
| <b>M12</b> |     |        |        |     |      |        |      |     |          |
| No         | 730 | 11.36  | 13.608 | 0   | 0    | 6      | 18   | 59  | <0.0001  |
| Yes        | 32  | 31.312 | 16.746 | 0   | 18.5 | 35     | 44.5 | 57  |          |
| Overall    | 762 | 12.198 | 14.313 | 0   | 0    | 7      | 20   | 59  |          |

Table 17

Modified Brief Symptom Inventory-Depression score by suicidal ideation on Patient Health Questionnaire item 9

|            | N   | Mean   | SD    | Min | Q1   | Median | Q3    | Max | <i>p</i> |
|------------|-----|--------|-------|-----|------|--------|-------|-----|----------|
| <b>W02</b> |     |        |       |     |      |        |       |     |          |
| No         | 879 | 3.414  | 4.165 | 0   | 0    | 2      | 5     | 20  | <0.0001  |
| Yes        | 46  | 10.609 | 5.157 | 0   | 6.25 | 12     | 14    | 20  |          |
| Overall    | 925 | 3.772  | 4.498 | 0   | 0    | 2      | 6     | 20  |          |
| <b>M03</b> |     |        |       |     |      |        |       |     |          |
| No         | 821 | 2.798  | 4.09  | 0   | 0    | 1      | 4     | 19  | <0.0001  |
| Yes        | 47  | 11.17  | 5.088 | 1   | 8    | 11     | 15.5  | 20  |          |
| Overall    | 868 | 3.251  | 4.559 | 0   | 0    | 1      | 5     | 20  |          |
| <b>M06</b> |     |        |       |     |      |        |       |     |          |
| No         | 788 | 2.477  | 3.772 | 0   | 0    | 1      | 3     | 20  | <0.0001  |
| Yes        | 38  | 12.079 | 5.01  | 1   | 9.25 | 12     | 16    | 20  |          |
| Overall    | 826 | 2.919  | 4.33  | 0   | 0    | 1      | 4     | 20  |          |
| <b>M12</b> |     |        |       |     |      |        |       |     |          |
| No         | 730 | 2.414  | 3.611 | 0   | 0    | 1      | 4     | 20  | <0.0001  |
| Yes        | 32  | 12.156 | 5.714 | 2   | 7.75 | 12.5   | 17.25 | 20  |          |
| Overall    | 762 | 2.823  | 4.2   | 0   | 0    | 1      | 4     | 20  |          |
